# Supplementary material
Source: PubMed Central journal article supplement (PMC4339411)

## ***In Utero* and Lactational Lead Exposure in Mice Causes Long-Term Changes in Brain DNA Methylation**

Francisco Javier Sánchez-Martín<sup>1,\*</sup>, Diana M. Lindquist<sup>2</sup>, Julio Landero-Figueroa<sup>3</sup>, Xiang Zhang<sup>1</sup>, Jing Chen<sup>1</sup>, Kim M. Cecil<sup>2</sup>, Mario Medvedovic<sup>1</sup> and Alvaro Puga<sup>1</sup>

### **SUPPLEMENTAL FIGURE LEGENDS**

**Supplemental figure S1. Manhattan plot of  $-\log_{10}$  *p*-values of the comparison of differential methylation across the mouse genome induced by lead acetate in the cortex of male and female mice.** Note the significant hypomethylation of the X chromosome.

**Supplemental figure S2. Gene expression analysis of 60 genes in hippocampus of female (A) and male (B) mice that show differential methylation after perinatal exposure to 3 ppm of lead.** Levels of mRNA expression were determined by RT-qPCR, normalized to Gapdh expression and expressed relative to the corresponding level in untreated controls. Tissues from each mouse were processed individually and the data shown represent the mean  $\pm$  SEM of three mice. (\*)  $p < 0.05$ .

**Supplemental figure S3. Integrative Genomic Viewer (IGV) view of the methylation status of the *Rn4.5s* gene.** The methylation status of the *Rn4.5s* gene in hippocampus of male and female mice exposed to 3 or 30 ppm of lead and their corresponding controls are shown. The promoter of the *Rn4.5s* gene is shown inside the red box.

**Supplemental figure S4. Integrative Genomic Viewer (IGV) view of the methylation status of the *Rn45s* gene.** The methylation status of the *Rn4.5s* gene in hippocampus of male and female mice exposed to 3 or 30 ppm of lead and their corresponding controls are shown. The promoter of the *Rn45s* gene is shown inside the red box.

**Supplemental figure S5. Integrative Genomic Viewer (IGV) view of the methylation status of the *Sfi1* gene.** The methylation status of the *Sfi1* gene in hippocampus of male and female mice exposed to 3 or 30 ppm of lead and their corresponding controls are shown. The promoter of the gene *Sfi1* is shown inside the red box.

**Supplemental figure 6. Integrative Genomic Viewer (IGV) view of the methylation status of the *Dynt1b* gene.** The methylation status of the *Dynt1b* gene in hippocampus of male and female mice exposed to 3 or 30 ppm of lead and their corresponding controls are shown. The promoter of the gene *Dynt1b* is shown inside the red box.

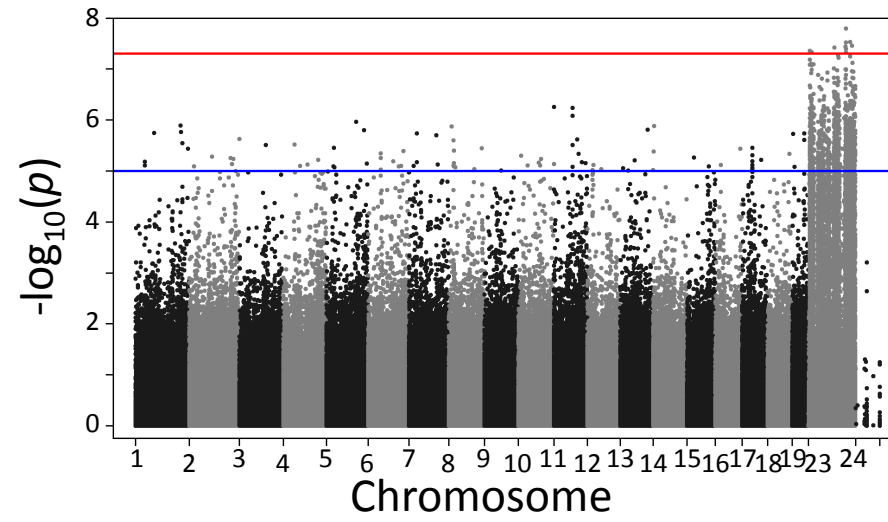

(A)

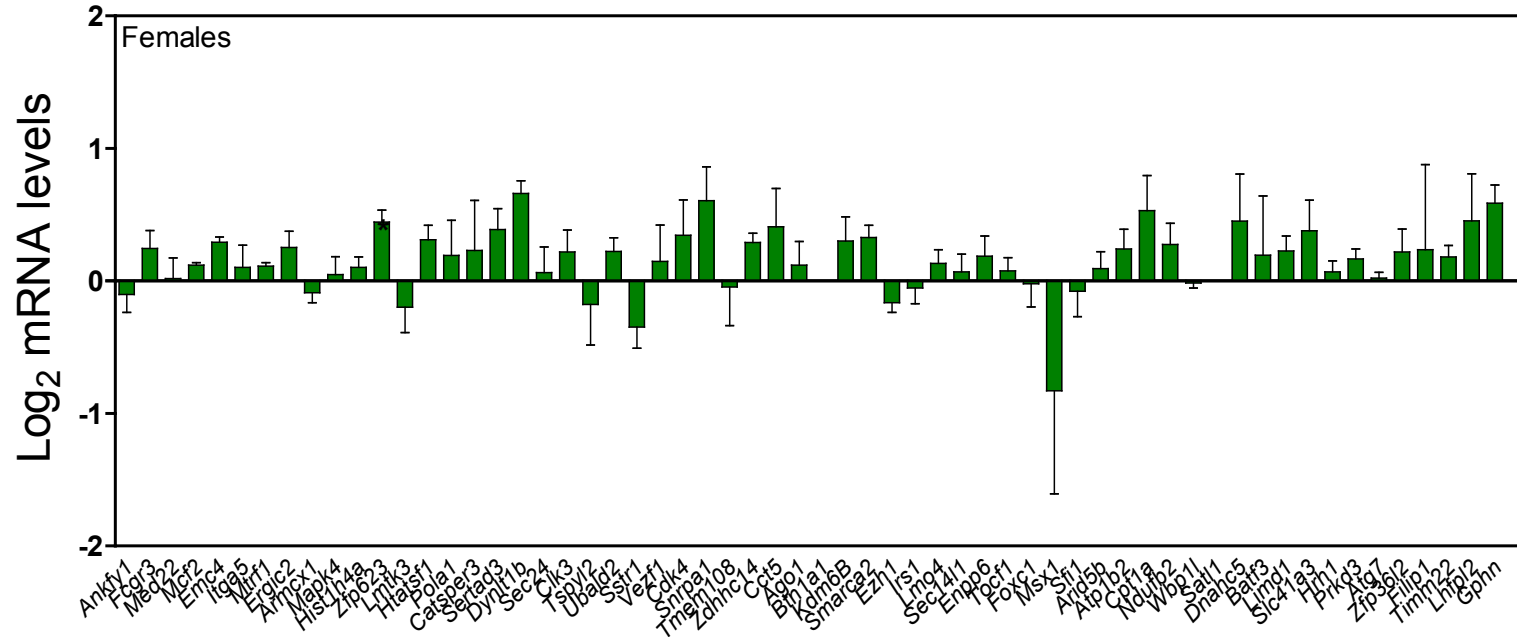

(B)

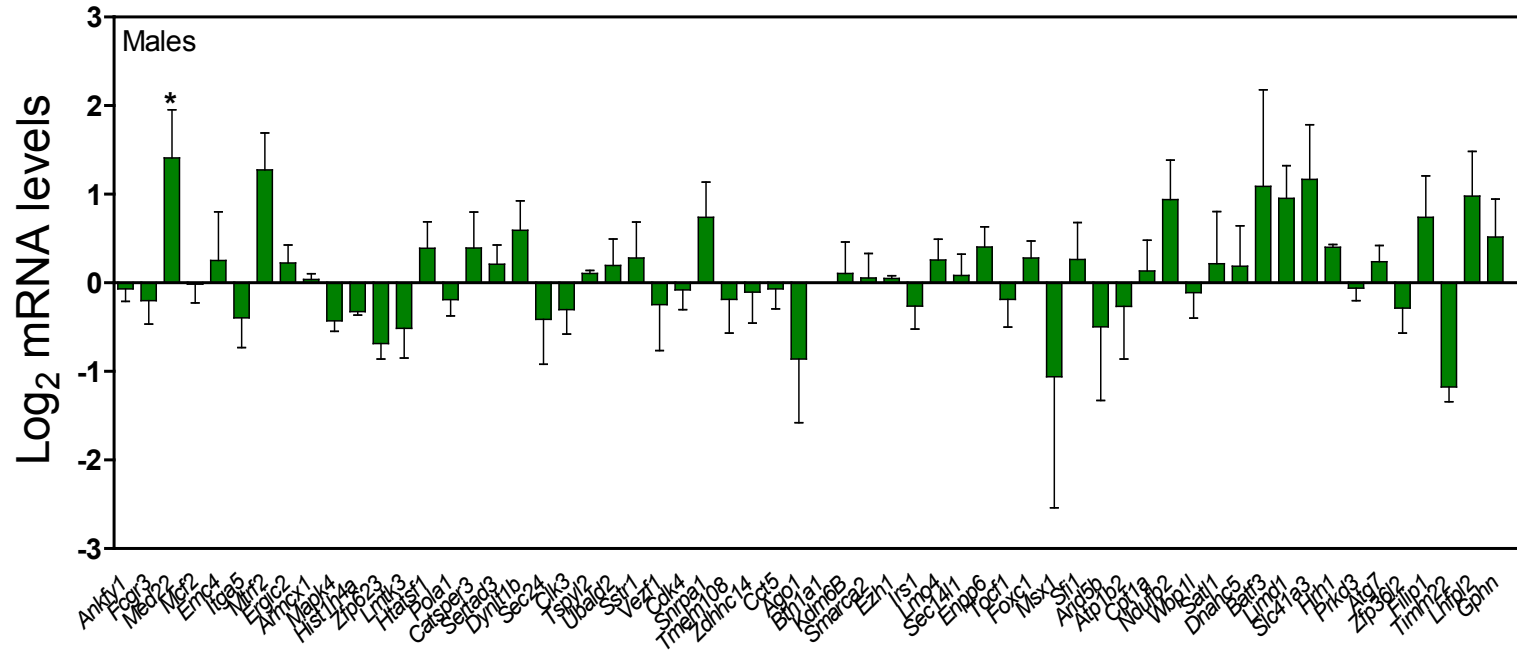

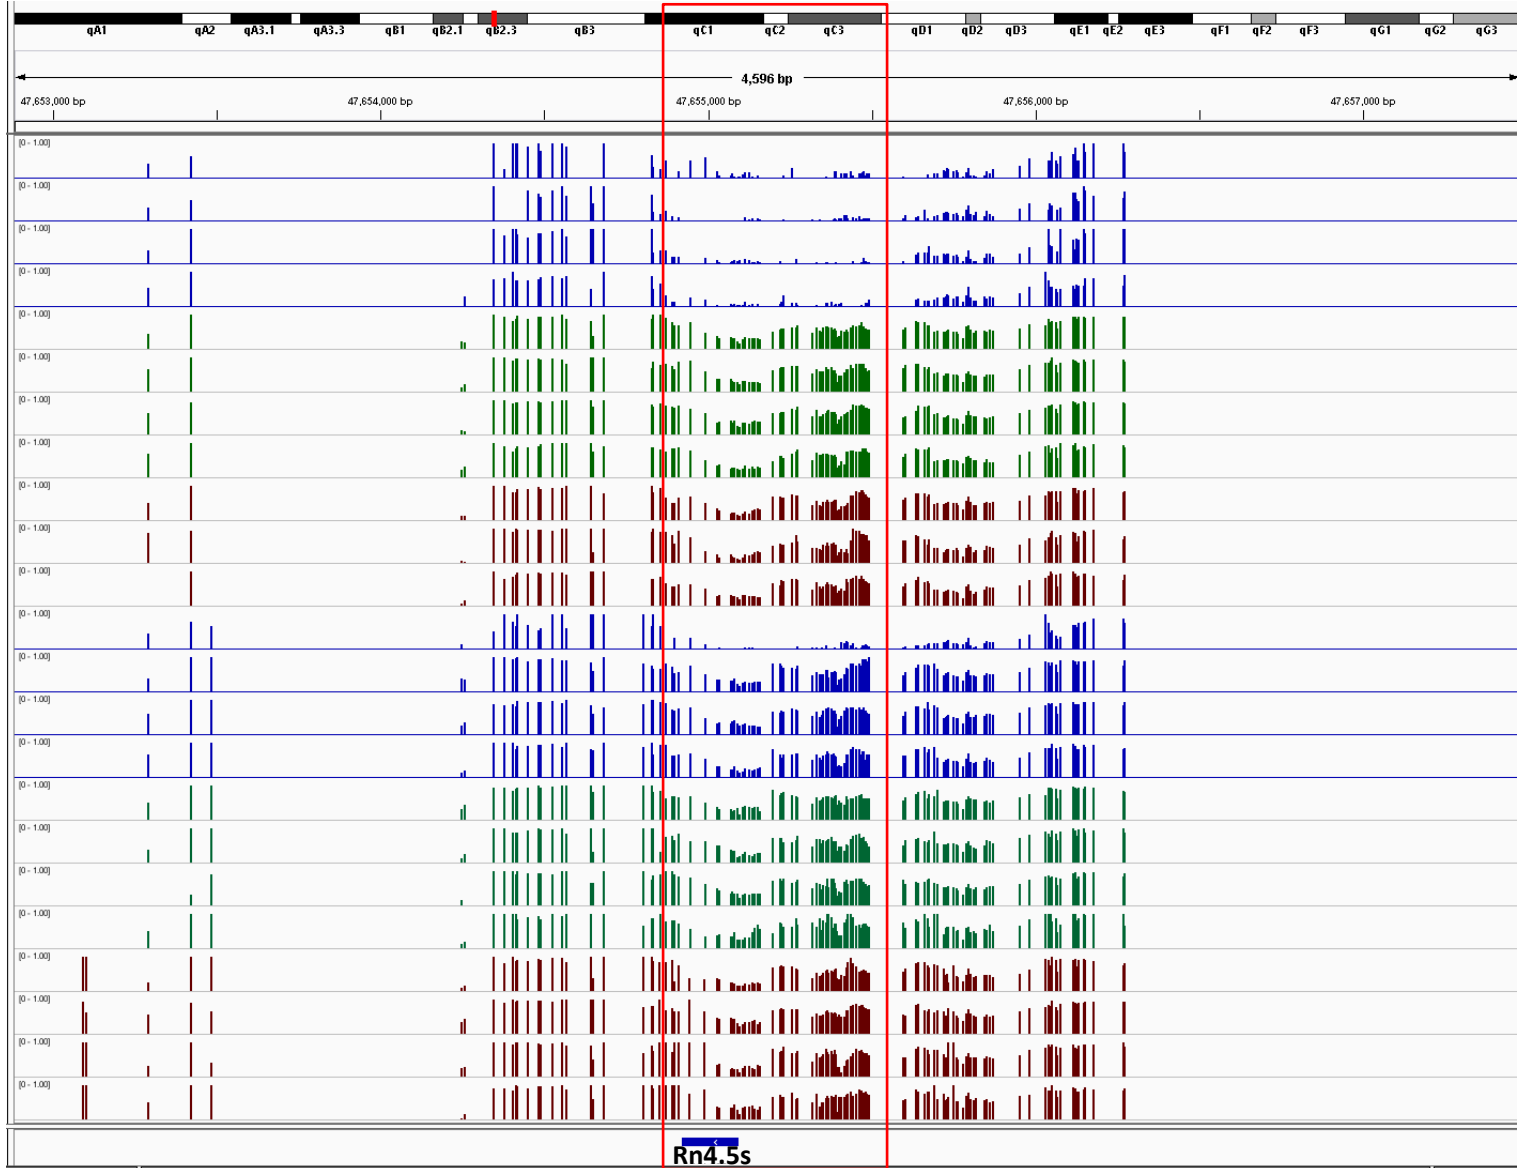

Females

Males

- Control-1
- Control-2
- Control-3
- Control-4
- 30 ppm Pb-1
- 30 ppm Pb-2
- 30 ppm Pb-3
- 30 ppm Pb-4
- 3 ppm Pb-1
- 3 ppm Pb-2
- 3 ppm Pb-3
- Control-1
- Control-2
- Control-3
- Control-4
- 30 ppm Pb-1
- 30 ppm Pb-2
- 30 ppm Pb-3
- 30 ppm Pb-4
- 3 ppm Pb-1
- 3 ppm Pb-2
- 3 ppm Pb-3
- 3 ppm Pb-3

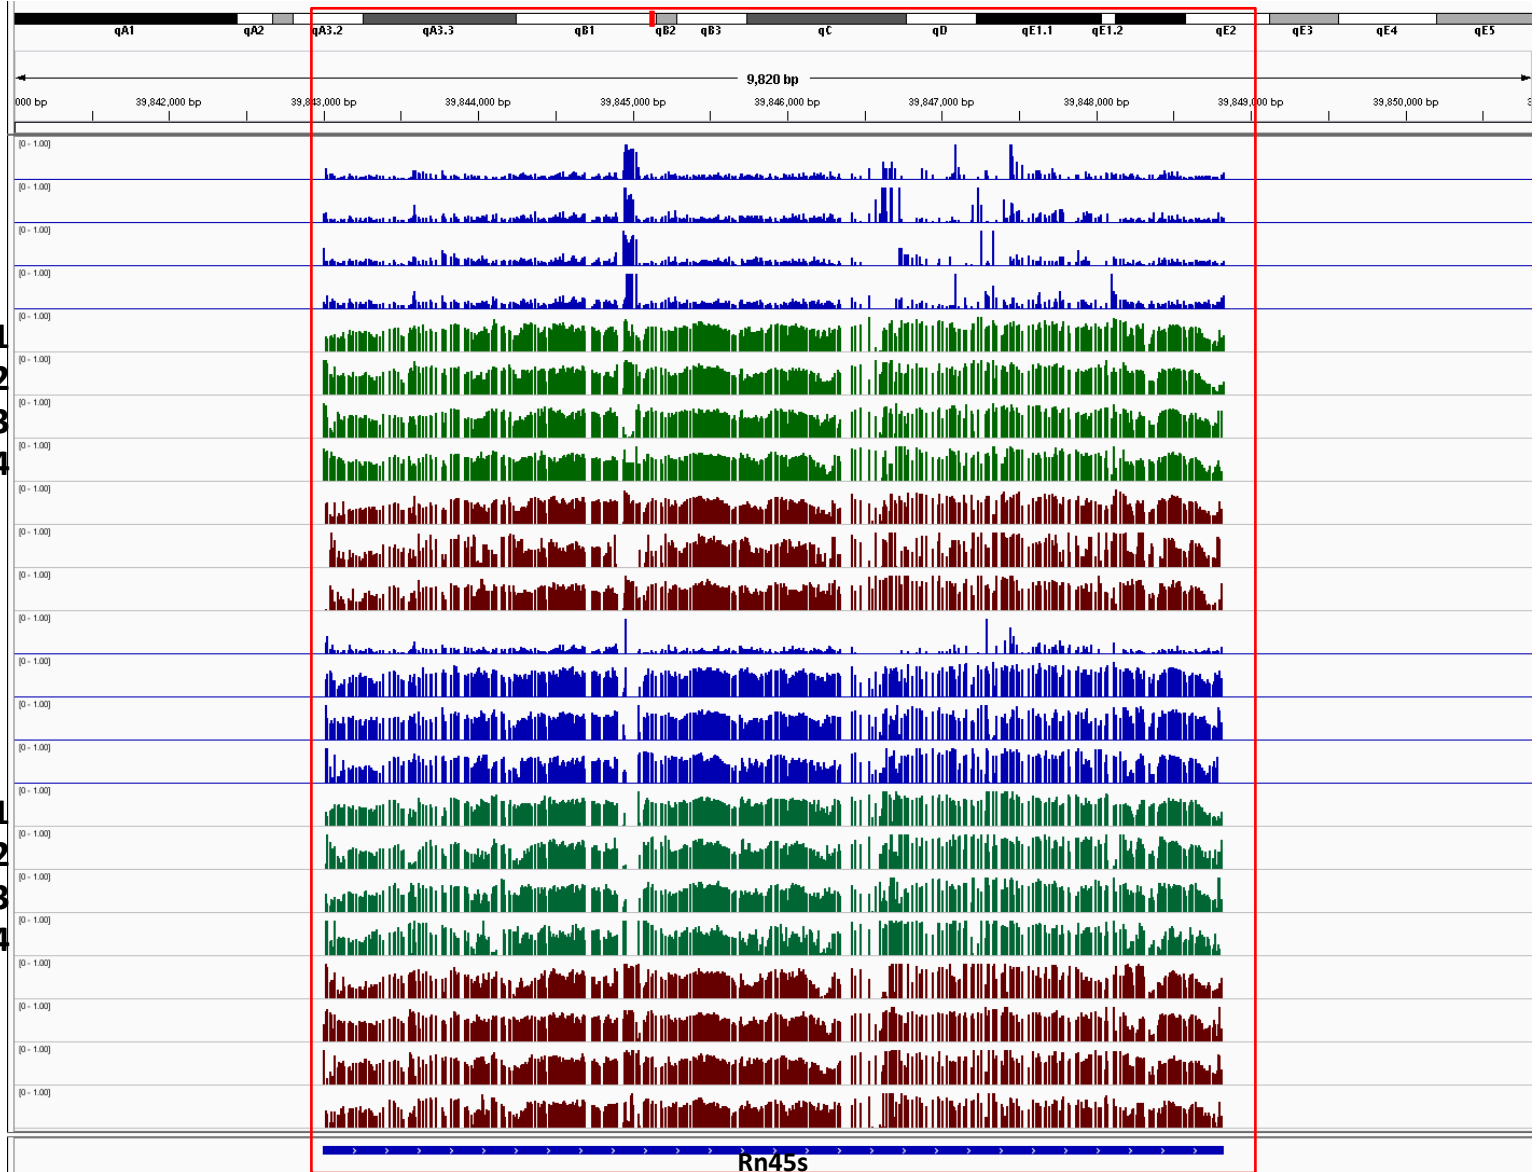

Females

Control-1  
Control-2  
Control-3  
Control-4  
30 ppm Pb-1  
30 ppm Pb-2  
30 ppm Pb-3  
30 ppm Pb-4  
3 ppm Pb-1  
3 ppm Pb-2  
3 ppm Pb-3

Males

Control-1  
Control-2  
Control-3  
Control-4  
30 ppm Pb-1  
30 ppm Pb-2  
30 ppm Pb-3  
30 ppm Pb-4  
3 ppm Pb-1  
3 ppm Pb-2  
3 ppm Pb-3  
3 ppm Pb-3

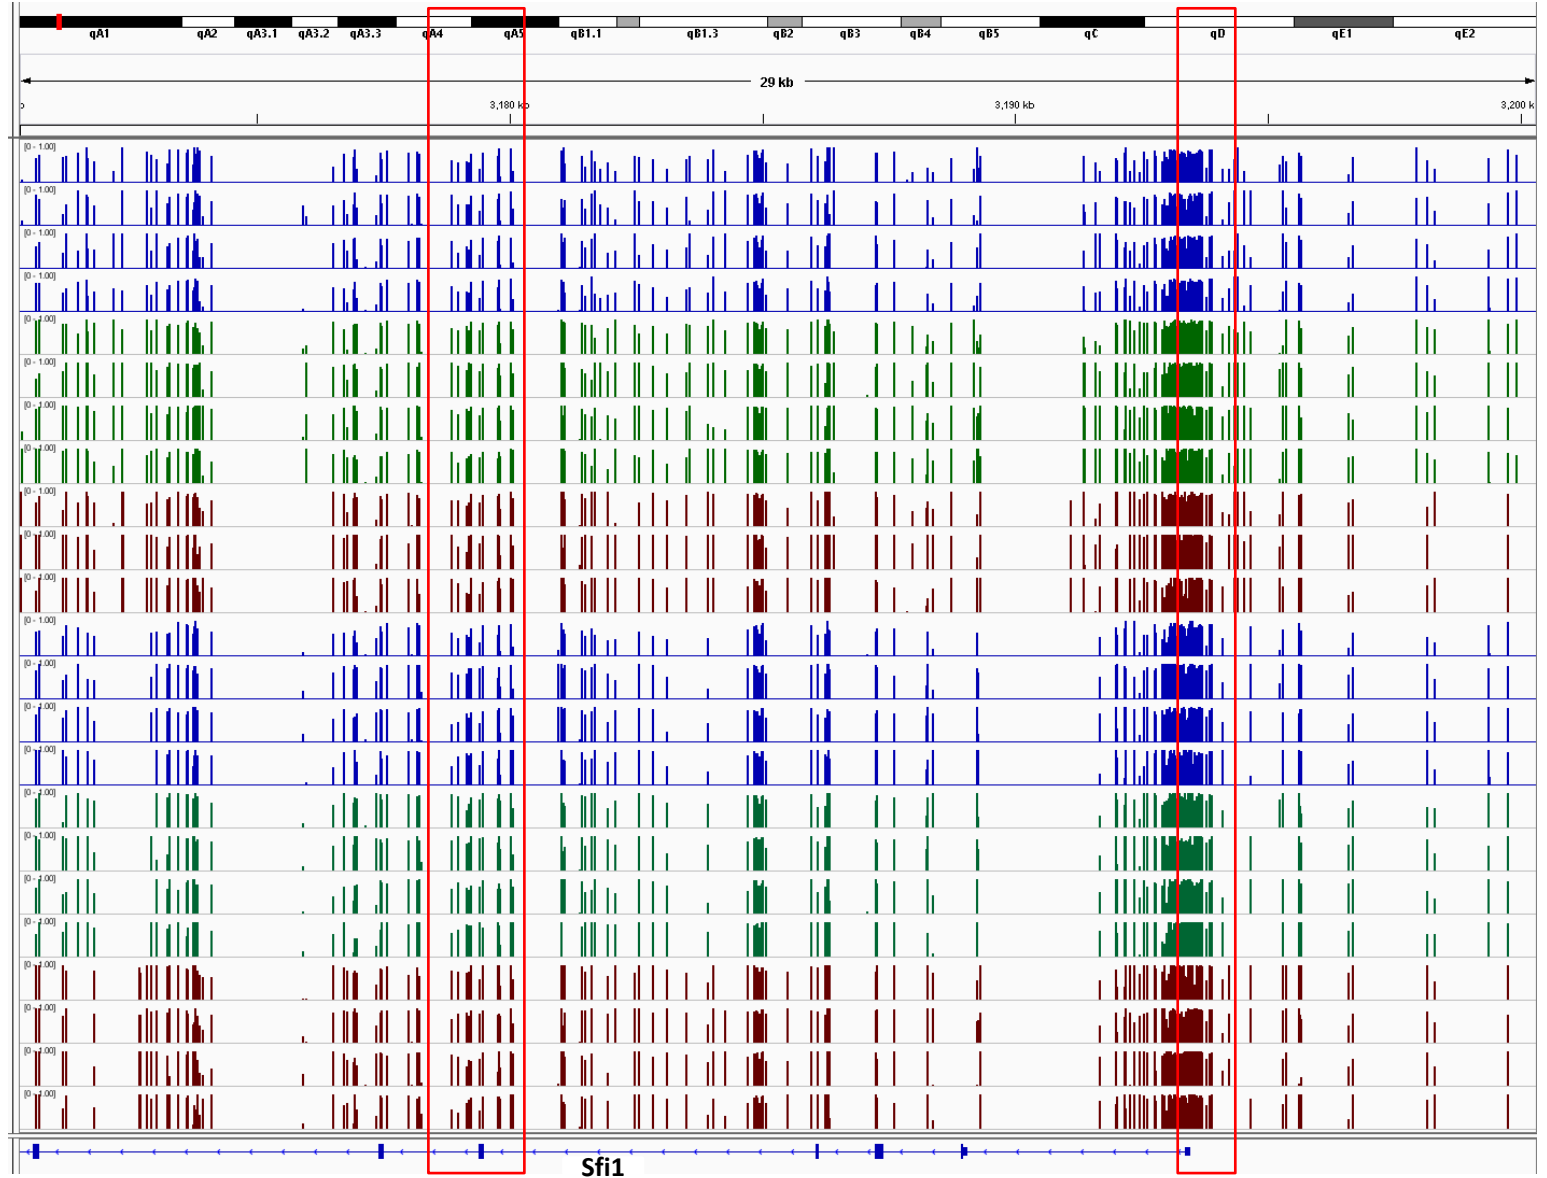

Females

Control-1  
Control-2  
Control-3  
Control-4  
30 ppm Pb-1  
30 ppm Pb-2  
30 ppm Pb-3  
30 ppm Pb-4  
3 ppm Pb-1  
3 ppm Pb-2  
3 ppm Pb-3

Males

Control-1  
Control-2  
Control-3  
Control-4  
30 ppm Pb-1  
30 ppm Pb-2  
30 ppm Pb-3  
30 ppm Pb-4  
3 ppm Pb-1  
3 ppm Pb-2  
3 ppm Pb-3  
3 ppm Pb-3

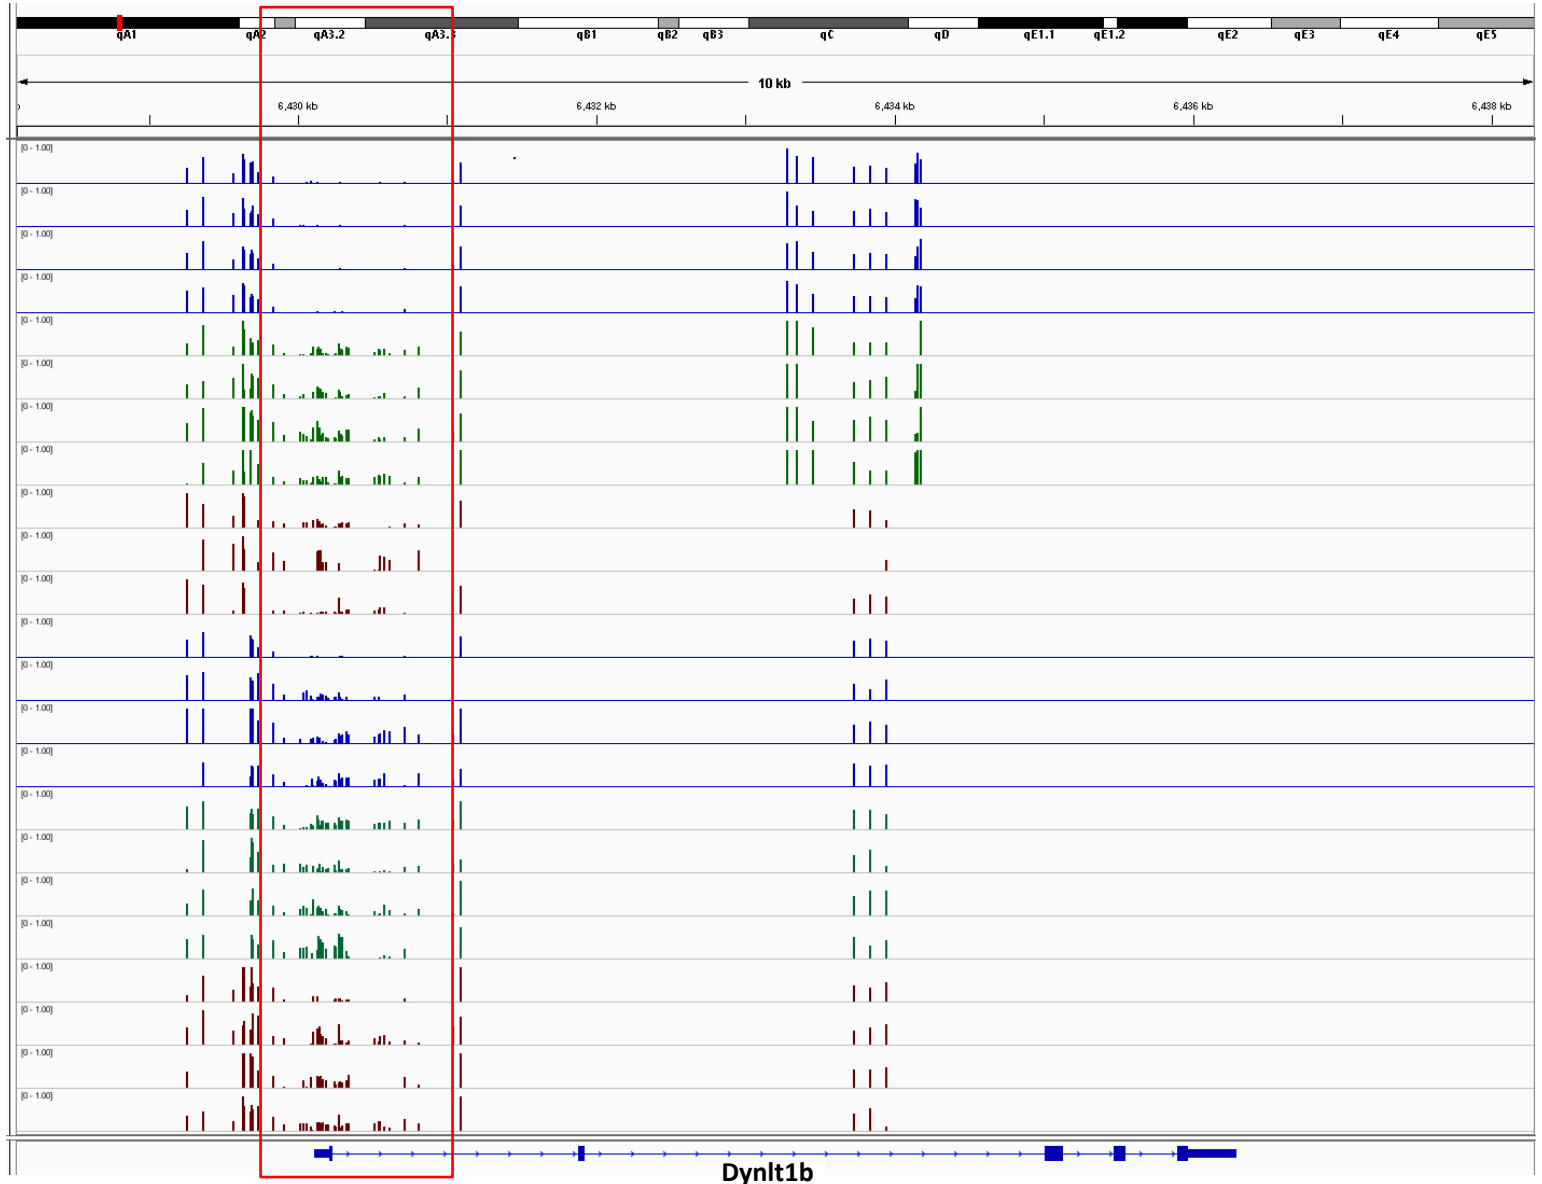

Supplement: NIHMS650756-supplement-1.pdf [file NIHMS650756-supplement-1.pdf]
